# Supplementary material for: Caenorhabditis elegans nematodes are not attracted to the terrestrial isopod Porcellio scaber
Source: bioRxiv preprint, doi:10.1101/2020.03.13.991406, version 1 (2020-03-15)
Supplement: Supplemental Table 4 [file 991406_file05.xlsx]

## Sheet: Sheet1
Date	Strain	CI
20170512	N2	-0.0333333
20170512	PB306	-0.25
20170515	N2	0.219512
20170515	PB306	-0.0277778
20170515	N2	0.0105263
20170515	PB306	-0.181818
